# Supplementary material for: Multifunctional underwater superoleophobic cellulose-based composite aerogel with oil/water separation, dye adsorption, and antibacterial activities
Source: Royal Society of Chemistry journal article supplement (doi:10.1039/d3nj05042d), 2023-12-15
Supplement: d3nj05042d4.pdf [file d3nj05042d4.pdf]

## Supporting Information

### **Multifunctional Underwater Superoleophobic Cellulose-based Composite Aerogel with Oil/Water Separation, Dye Adsorption, and Antibacterial Activities**

**Zhen Zhang<sup>a★</sup>, Linyan Zhao<sup>a★</sup>, Lin Cui<sup>b,\*</sup>, DongMei Li<sup>b</sup>, Xing Tian<sup>b</sup>, Zhiyong Liu<sup>a\*</sup>, Yanlong Tai<sup>a,b</sup>,**

**Shenglin Liu<sup>d</sup>**

<sup>a</sup> School of Chemistry and Chemical Engineering, Shihezi University/State Key Laboratory Incubation Base for Green Processing of Chemical Engineering, Xinjiang 832003, P. R. China.

<sup>b</sup>School of Medical Science, Shihezi University

<sup>c</sup>Key Laboratory of Human-Machine Intelligence-

Synergy Systems of Chinese Academy of Sciences (CAS), Shenzhen Institutes of Advanced Technology, CAS, Shenzhen, 518055, China.

<sup>d</sup>Xinjiang Xiyu Muge Agricultural Technology Co., Ltd

★These authors contributed equally to this work.

#### **\*Corresponding author**

Lin Cui (E-mail: [clinlzyong@163.com](mailto:clinlzyong@163.com))

Zhiyong Liu (E-mail: [lzyongclin@sina.com](mailto:lzyongclin@sina.com))

## **Contents**

**S1.** Contact angle of PDA/PEI-decorated CE/QCE composite aerogel to cyclohexane in water (O for oil droplets, W for water).

**S2.** The stress-strain curves of PDA/PEI-decorated CE/QCE composite aerogel at compressive strain.

## **Movies:**

Movie S1: Water contact angle video of PDA/PEI-decorated CE/QCE composite aerogel.

Movie S2: Processes of demonstrating the self-cleaning and anti-oil-adhesion performance of PDA/PEI-decorated CE/QCE composite aerogel.

Movie S3: Processes of oil/water separation.

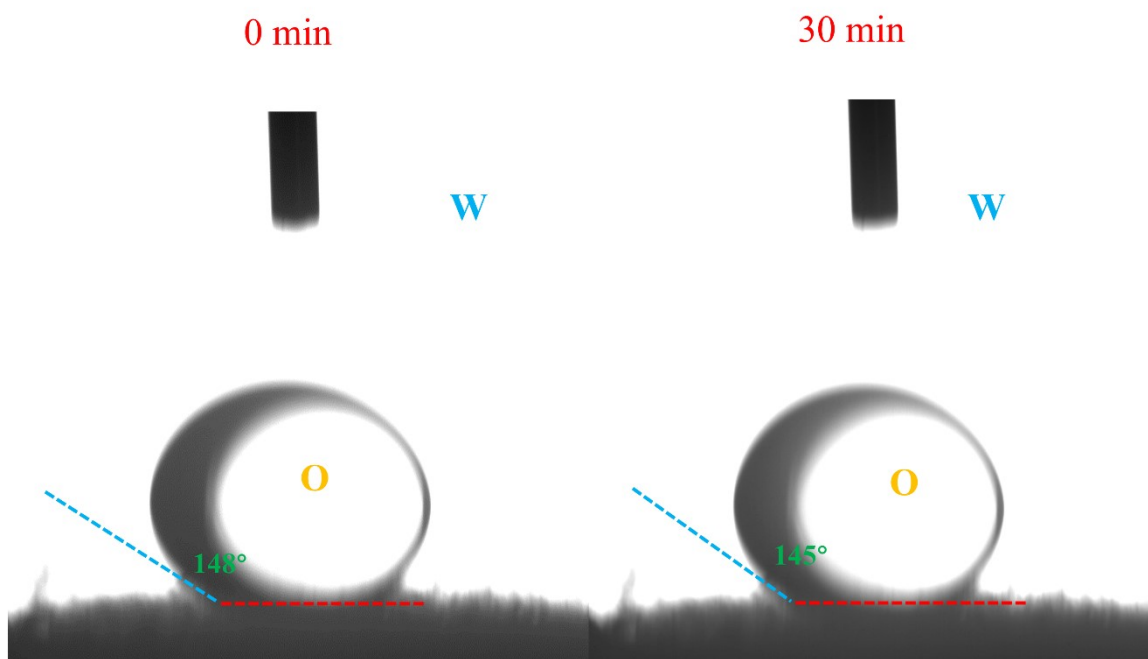

**Figure S1.** Contact angle of PDA/PEI-decorated CE/QCE composite aerogel to cyclohexane in water (O for oil droplets, W for water).

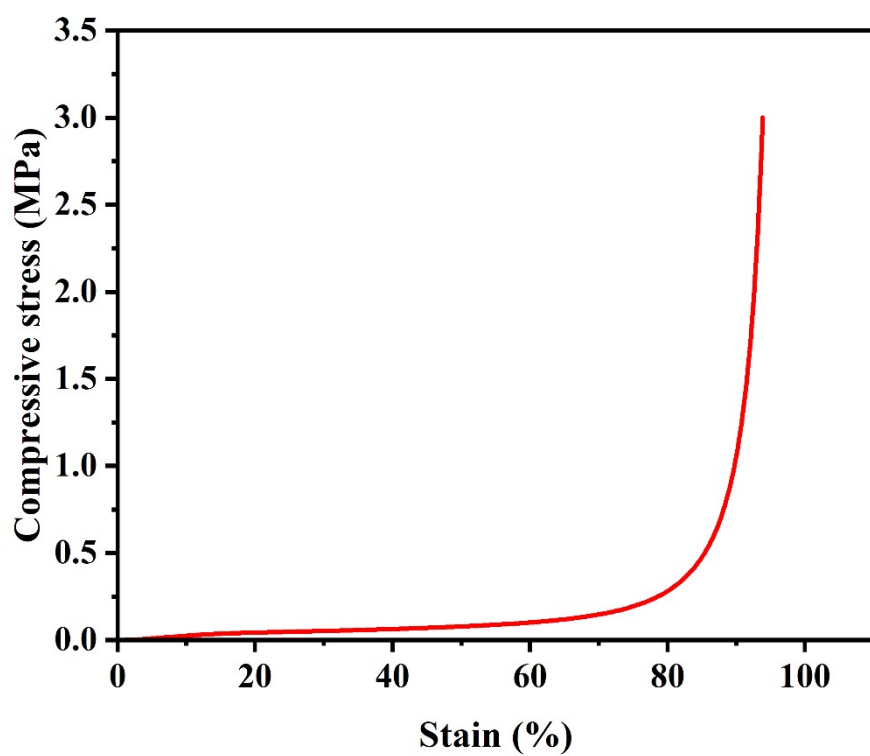

**Figure S2.** The stress-strain curves of PDA/PEI-decorated CE/QCE composite aerogel at compressive strain.
